# Supplementary material for: Sorption of Polycyclic Aromatic Sulfur Heterocycles (PASH) on Nylon Microplastics at Environmentally Relevant Concentrations
Source: MDPI journal article supplement (doi:10.3390/molecules29071653), 2024-04-07
Supplement: s1 [file s1]

## Supplemental Information

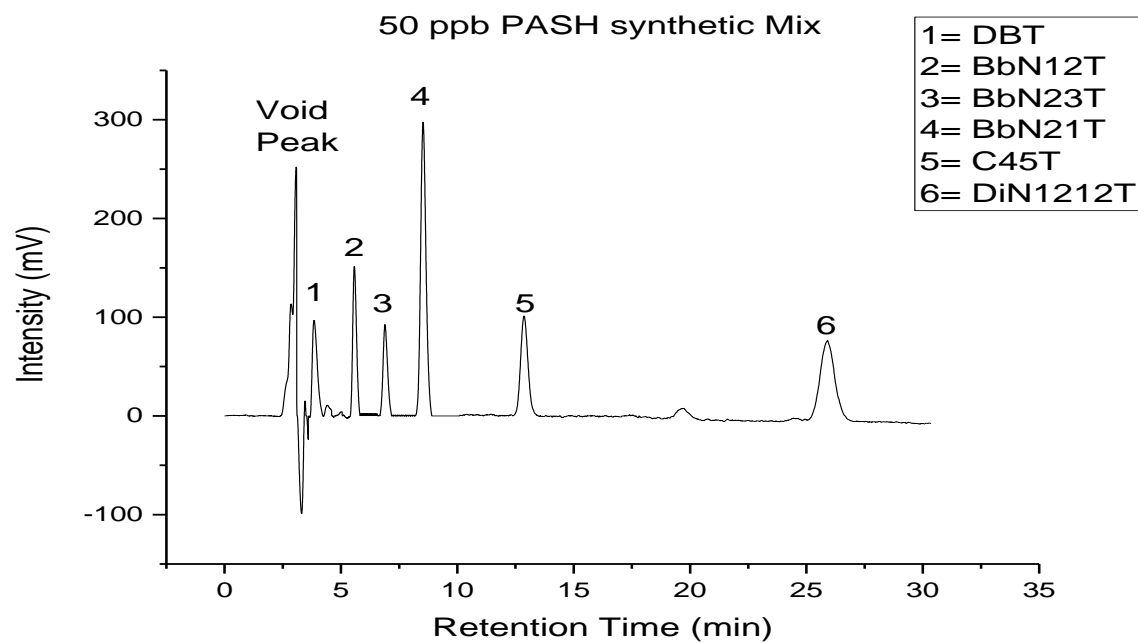

Figure S1: HPLC-FL Chromatogram of the PASH. All PASH concentration is 50 ng/mL.

Table S1: Summary of Fluorescence wavelengths used for HPLC Detection

| PASH     | Excitation/ Emission Wavelength<br>(nm) | Time Range<br>(min) |
|----------|-----------------------------------------|---------------------|
| DBT      | 286/342                                 | 0-4.7               |
| BbN12T   | 264/352                                 | 4.8-6.4             |
| BbN23T   | 274/376                                 | 6.5-8.0             |
| BbN21T   | 277/366                                 | 8.1-10.0            |
| C45T     | 359/385                                 | 10.1-16.1           |
| DiN1212T | 275/381                                 | 16.1-25.0           |

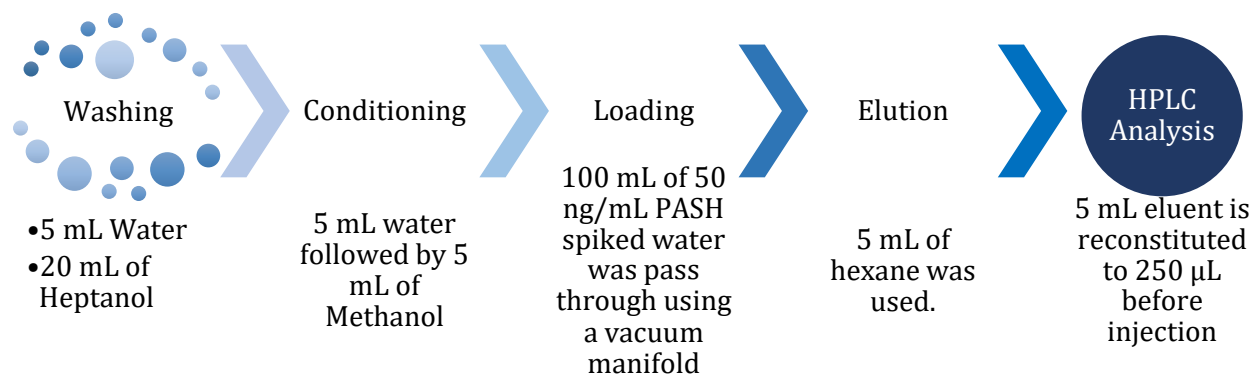

Figure S2: Summary of SPE method used in this study. The flow rate used was 1-2 mL/min.

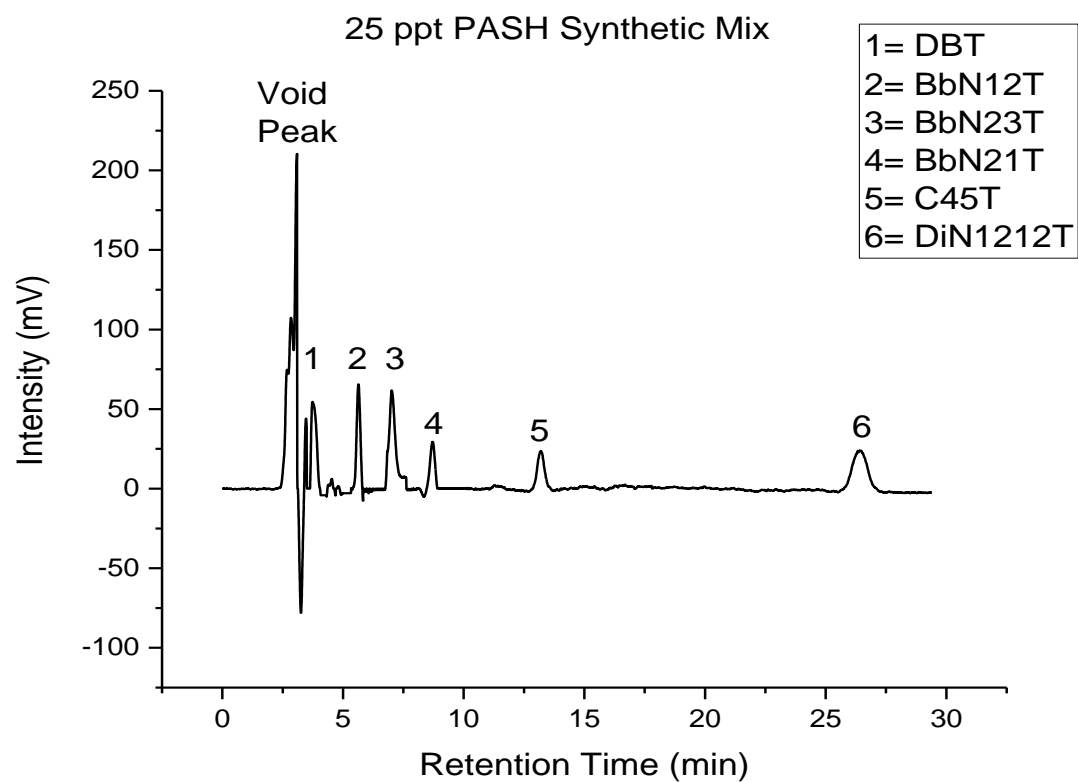

Figure S3: HPLC-FL Chromatogram following SPE extraction procedure, where the concentration of all PASH were 25 pg/mL prior to extraction.

Table S2: Values used for the calculation of the maximum sorption uptake with corresponding standard deviations.

| Nylon Type | PASH   | Time (hr) | C <sub>T</sub> (ng/L) | S <sub>CT</sub> | C <sub>aq</sub> (ng/L) | S <sub>Caq</sub> | C <sub>T</sub> -C <sub>aq</sub> (ng/L) | S <sub>(CT-Caq)</sub> | q <sub>p</sub> (ng/g) | S <sub>qp</sub> |
|------------|--------|-----------|-----------------------|-----------------|------------------------|------------------|----------------------------------------|-----------------------|-----------------------|-----------------|
| Nylon 11   | BbN12T | 2.5       | 81.99                 | 2.91            | 40.11                  | 2.19             | 41.88                                  | 3.64                  | 27.82                 | 2.43            |
|            | BbN23T | 4.0       | 99.51                 | 5.69            | 48.05                  | 4.75             | 51.46                                  | 7.40                  | 31.41                 | 4.61            |
|            | BbN21T | 2.5       | 64.64                 | 4.11            | 33.94                  | 3.62             | 30.70                                  | 5.48                  | 20.20                 | 3.64            |
| Nylon 6,12 | BbN12T | 0.5       | 79.80                 | 2.84            | 39.40                  | 2.19             | 40.40                                  | 3.59                  | 38.11                 | 3.52            |
|            | BbN23T | 1.5       | 88.11                 | 4.81            | 46.38                  | 4.79             | 41.73                                  | 6.97                  | 46.19                 | 7.72            |
|            | BbN21T | 0.5       | 56.51                 | 3.63            | 34.72                  | 3.75             | 21.79                                  | 5.22                  | 26.61                 | 5.12            |

Equations used for error Propagation used in this study:

**Equation S1:** Error of measurement from the calibration curve (for both  $c_t$  and  $c_{aq}$ )

$$s_c = \frac{S_{y/x}}{b} \sqrt{\frac{1}{m} + \frac{1}{n} + \frac{(y_o - \bar{y})^2}{b^2 \sum_i (x_i - \bar{x})^2}}$$

**Equation S2:** Linear propagation ( $q_t - q_{aq}$ )

$$s_{(c_t - c_{aq})} = \sqrt{s_{c_t}^2 + s_{c_{aq}}^2}$$

**Equation S3:** Scaling the standard deviation

$$S_{q_p} = \frac{(s_{(c_t - c_{aq})}) \times 100 L}{m_p}$$

#### Legend

$s_c$ = The standard deviation of the concentration

$S_{y/x}$ = standard deviation of the residual

$b$ = slope

$m$ = number of measurements

$n$ = number of calibration curve points

$y_o - \bar{y}$  = error of the average intensity

$x_i - \bar{x}$ = error from the centroid point of the calibration curve

$s_{(c_t - c_{aq})}$ = standard deviation of the difference between the total concentration and the aqueous concentration

$s_{c_t}^2$ = standard deviation of the total concentration squared

$s_{c_{aq}}^2$ =standard deviation of the aqueous concentration squared

$S_{q_p}$  = standard deviation of the mass on the pellet per gram of pellet

$m_p$ = mass of pellets

Table S3: Maximum Sorption Uptake Masses and Statistical Comparison.

| <b>PASH</b> | <b>Nylon 11<br/>(ng/g)</b> | <b>Nylon 6,12<br/>(ng/g)</b> | <b>Statistically Equivalent<sup>1</sup></b> |
|-------------|----------------------------|------------------------------|---------------------------------------------|
| BbN12T      | 27.82 ± 2.43               | 38.11 ± 3.52                 | No (T <sub>exp</sub> = 4.17)                |
| BbN23T      | 31.41 ± 4.61               | 46.19 ± 7.72                 | No (T <sub>exp</sub> = 2.85)                |
| BbN21T      | 20.20 ± 3.64               | 26.61 ± 5.12                 | Yes (T <sub>exp</sub> = 1.70)               |

1. T crit= 2.276 (P = 95%; N = 3)



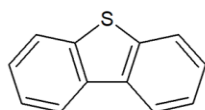

Dibenzothiophene  
(DBT)

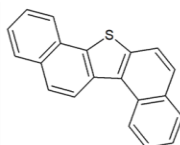

Dinaphtho[1,2-b:1',2'-d]thiophene  
(DiN1212T)

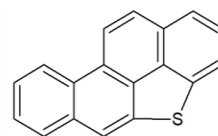

Chryseno[4,5-bcd]thiophene  
(C45T)

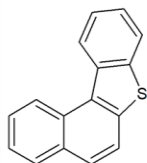

Benzo(b)naphtho[1,2-b]thiophene  
(BbN12T)

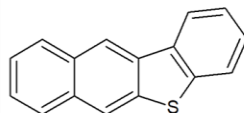

Benzo(b)naphtho[2,3-b]thiophene  
(BbN23T)

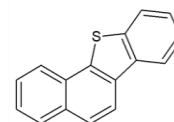

Benzo(b)naphtho[2,1-b]thiophene  
(BbN21T)

Figure S4: Structures of PASH used in this study

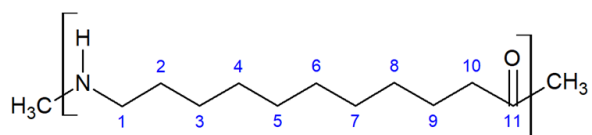

Nylon 11

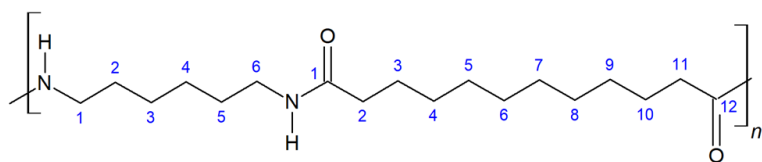

Nylon 6,12

Figure S5: Structures of Nylon 11 and Nylon 6,12 used in this study.

Table S4: Physicochemical Properties for Nylon 11 and Nylon 6,12

| Physicochemical Properties   | Nylon 11                | Nylon 6,12                                     |
|------------------------------|-------------------------|------------------------------------------------|
| Particle Size                | 3 mm <sup>1</sup>       | 2 mm <sup>2</sup>                              |
| Density (at 25 °C)           | 1.026 g/mL <sup>1</sup> | 1.300 g/mL <sup>2</sup>                        |
| Melting Temperature          | 198 °C <sup>1</sup>     | 218 °C <sup>2</sup>                            |
| Glass Transition Temperature | 46 °C <sup>2</sup>      | 46 °C <sup>2</sup>                             |
| Length of Monomer            | 12.24 Å <sup>3</sup>    | 8.83 Å <sup>3,4</sup> / 13.31 Å <sup>3,5</sup> |

1. Reference 22

2. Reference 23

3. Reference 24

4. Represents the length between the diamines section.

5. Represents the length between the dicarboxylic section.

Table S5: Dimensions of 10 Randomly Selected Nylon Pellets

| Nylon Type | Length<br>(mm) | Diameter<br>(mm) | Width<br>(mm)  | Mass<br>(g)       |
|------------|----------------|------------------|----------------|-------------------|
| Nylon 11   | $4.4 \pm 0.48$ | $2.7 \pm 0.46$   | $3.8 \pm 0.40$ | $0.027 \pm 0.002$ |
| Nylon 6,12 | $2.8 \pm 0.40$ | $2.0 \pm 0.00$   | $3.2 \pm 0.40$ | $0.016 \pm 0.001$ |
